# Supplementary material for: Conjugative Stabilization versus Anchimeric Assistance in Carbocations
Source: MDPI journal article supplement (doi:10.3390/molecules28010038), 2022-12-21
Supplement: s1 [file s1]

## Supporting material

# Conjugative Stabilization versus Anchimeric Assistance in Carbocations

Bagrat A. Shainyan

*A. E. Favorsky Irkutsk Institute of Chemistry, Siberian Division of the Russian Academy of Sciences, 1 Favorsky Street, 664033 Irkutsk, Russian Federation*

Structures, MP2/cc-pVTZ optimized energies (a.u.) and Cartesian coordinates for all computed structures. The structures were confirmed to be minima through vibrational analysis.

1a

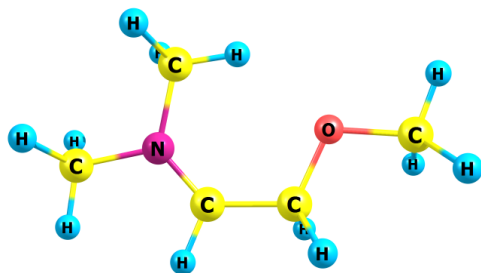

E(MP2) = -326.8187254

|   |           |           |           |
|---|-----------|-----------|-----------|
| 6 | -0.492390 | -0.949190 | -0.000171 |
| 6 | 0.991483  | -0.923570 | -0.000429 |
| 8 | 1.560401  | 0.342968  | -0.000172 |
| 7 | -1.355412 | 0.003769  | -0.000022 |
| 6 | 2.993765  | 0.262304  | 0.000500  |
| 6 | -2.796107 | -0.306934 | 0.000461  |
| 6 | -1.067604 | 1.449866  | -0.000304 |
| 1 | -0.911598 | -1.950947 | -0.000062 |
| 1 | 1.294334  | -1.518133 | 0.877401  |
| 1 | 1.294047  | -1.517686 | -0.878670 |
| 1 | 3.342458  | -0.257014 | 0.894152  |
| 1 | 3.358136  | 1.283148  | 0.000417  |
| 1 | 3.343299  | -0.257404 | -0.892602 |
| 1 | -3.237652 | 0.137272  | 0.889255  |
| 1 | -2.944859 | -1.381557 | -0.000163 |
| 1 | -3.238505 | 0.138410  | -0.887332 |
| 1 | -1.534976 | 1.871410  | 0.886773  |
| 1 | -1.534292 | 1.870867  | -0.888006 |
| 1 | -0.000596 | 1.616651  | 0.000022  |

**1b**

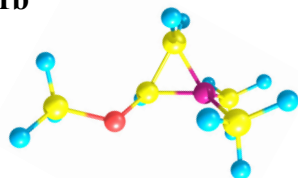

E(MP2) = -326.7732618

|   |   |           |           |           |
|---|---|-----------|-----------|-----------|
| 6 | 0 | 0.410390  | -0.520402 | -0.171463 |
| 6 | 0 | -0.264144 | -0.708645 | 1.143099  |
| 7 | 0 | -0.961871 | 0.019486  | 0.038661  |
| 6 | 0 | -1.137047 | 1.483778  | 0.160848  |
| 6 | 0 | -2.077056 | -0.677085 | -0.633189 |
| 8 | 0 | 1.348452  | 0.445997  | -0.323899 |
| 6 | 0 | 2.685374  | -0.079246 | -0.160327 |
| 1 | 0 | 0.433465  | -1.351156 | -0.872805 |
| 1 | 0 | -0.710457 | -1.657696 | 1.401868  |
| 1 | 0 | 0.044997  | -0.060847 | 1.950933  |
| 1 | 0 | -1.251255 | 1.894842  | -0.838632 |
| 1 | 0 | -0.262605 | 1.910852  | 0.637296  |
| 1 | 0 | -2.030660 | 1.659062  | 0.754416  |
| 1 | 0 | -2.978477 | -0.526970 | -0.043842 |
| 1 | 0 | -1.849423 | -1.737348 | -0.699721 |
| 1 | 0 | -2.195395 | -0.255025 | -1.627933 |
| 1 | 0 | 3.350621  | 0.760649  | -0.319404 |
| 1 | 0 | 2.877082  | -0.854288 | -0.901707 |
| 1 | 0 | 2.812497  | -0.476849 | 0.846286  |

**1c**

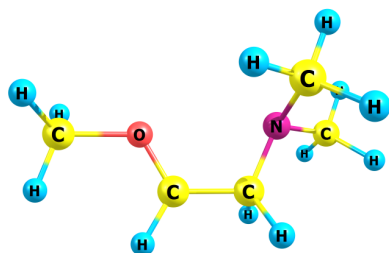

E(MP2) = -326.7732618

|   |           |           |           |
|---|-----------|-----------|-----------|
| 6 | -0.996039 | -0.739797 | 0.415339  |
| 6 | 0.462730  | -0.883206 | 0.471793  |
| 7 | 1.190078  | 0.097391  | -0.267985 |
| 8 | -1.531606 | 0.170613  | -0.254187 |
| 6 | 2.529384  | -0.393709 | -0.600612 |
| 6 | -3.002285 | 0.283440  | -0.330483 |
| 6 | 1.275630  | 1.359309  | 0.467537  |
| 1 | -1.635246 | -1.442100 | 0.956039  |
| 1 | 0.711853  | -0.967534 | 1.552278  |
| 1 | 0.642647  | -1.898907 | 0.083519  |

|   |           |           |           |
|---|-----------|-----------|-----------|
| 1 | 3.136056  | -0.584391 | 0.293755  |
| 1 | 3.031095  | 0.355948  | -1.207187 |
| 1 | 2.451373  | -1.309743 | -1.183432 |
| 1 | -3.454984 | -0.508874 | 0.258267  |
| 1 | -3.238329 | 0.202313  | -1.384846 |
| 1 | -3.234613 | 1.269358  | 0.054148  |
| 1 | 1.789694  | 2.091543  | -0.149813 |
| 1 | 1.825946  | 1.244863  | 1.411034  |
| 1 | 0.280289  | 1.744662  | 0.684182  |

2a

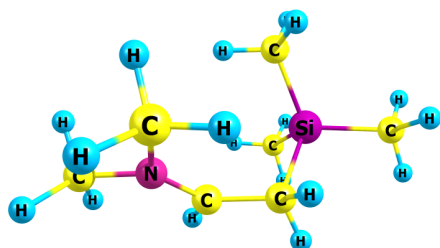

E(MP2) = -620.4688501

|    |           |           |           |
|----|-----------|-----------|-----------|
| 6  | 1.085888  | -0.574015 | -0.787423 |
| 6  | -0.097481 | 0.079444  | -1.281429 |
| 14 | -1.494472 | -0.016410 | 0.105881  |
| 7  | 2.113326  | -0.031943 | -0.205676 |
| 6  | -1.744206 | -1.824987 | 0.507458  |
| 6  | -2.990306 | 0.781314  | -0.668054 |
| 6  | -0.830755 | 0.934716  | 1.576483  |
| 6  | 3.204010  | -0.853191 | 0.331201  |
| 6  | 2.290891  | 1.408520  | -0.020544 |
| 1  | 1.125197  | -1.658011 | -0.836897 |
| 1  | 0.019641  | 1.128155  | -1.542100 |
| 1  | -0.509652 | -0.482063 | -2.119768 |
| 1  | -2.569816 | -1.934564 | 1.212570  |
| 1  | -0.862131 | -2.268394 | 0.971682  |
| 1  | -1.995053 | -2.402720 | -0.382975 |
| 1  | -3.818310 | 0.778976  | 0.042624  |
| 1  | -3.312334 | 0.239480  | -1.557449 |
| 1  | -2.792273 | 1.816359  | -0.946887 |
| 1  | -1.569455 | 0.928803  | 2.379922  |
| 1  | -0.627131 | 1.977005  | 1.328218  |
| 1  | 0.079160  | 0.482015  | 1.974984  |
| 1  | 3.295709  | -0.660016 | 1.398246  |
| 1  | 4.130208  | -0.574803 | -0.166958 |
| 1  | 2.989771  | -1.903346 | 0.159987  |
| 1  | 2.285623  | 1.624638  | 1.046280  |
| 1  | 1.498045  | 1.960540  | -0.508844 |
| 1  | 3.253876  | 1.690465  | -0.441389 |

2b

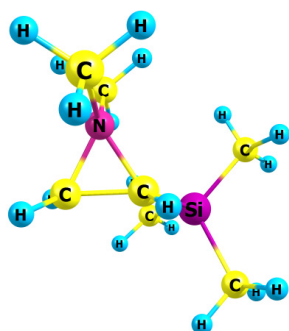

E(MP2) = -620.4357172

|    |           |           |           |
|----|-----------|-----------|-----------|
| 6  | -0.444636 | -0.787020 | 0.114147  |
| 6  | -1.314640 | -0.998663 | -1.083394 |
| 14 | 1.311540  | 0.016200  | 0.086877  |
| 6  | 2.413820  | -1.440901 | 0.470250  |
| 6  | 1.366149  | 1.328752  | 1.418751  |
| 6  | 1.660178  | 0.699923  | -1.621571 |
| 7  | -1.742424 | -0.047977 | -0.035689 |
| 6  | -1.733812 | 1.391986  | -0.350976 |
| 6  | -2.862749 | -0.457867 | 0.833129  |
| 1  | -0.565831 | -1.553830 | 0.874146  |
| 1  | -1.035090 | -0.524734 | -2.014306 |
| 1  | -1.934798 | -1.880654 | -1.158601 |
| 1  | 3.458451  | -1.126655 | 0.462017  |
| 1  | 2.301160  | -2.234473 | -0.269104 |
| 1  | 2.199869  | -1.855130 | 1.455919  |
| 1  | 2.395998  | 1.664430  | 1.552342  |
| 1  | 1.023054  | 0.938959  | 2.377898  |
| 1  | 0.770672  | 2.205897  | 1.166295  |
| 1  | 2.713026  | 0.987036  | -1.663423 |
| 1  | 1.083671  | 1.588577  | -1.877877 |
| 1  | 1.504496  | -0.053166 | -2.395307 |
| 1  | -2.661418 | 1.635757  | -0.864590 |
| 1  | -0.885063 | 1.611225  | -0.990118 |
| 1  | -1.658098 | 1.948845  | 0.579643  |
| 1  | -3.796983 | -0.181385 | 0.349186  |
| 1  | -2.763388 | 0.054373  | 1.787242  |
| 1  | -2.820182 | -1.533297 | 0.980165  |

3a

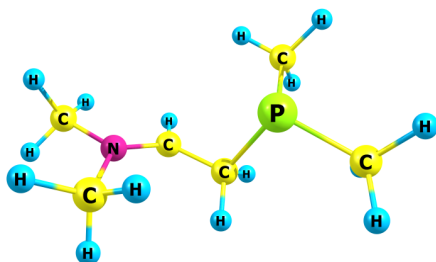

E(MP2) = -632.4474904

|    |           |           |           |
|----|-----------|-----------|-----------|
| 6  | -0.952320 | -0.411011 | 0.752700  |
| 6  | 0.279056  | 0.333169  | 0.989107  |
| 15 | 1.408973  | 0.115106  | -0.539637 |
| 7  | -1.962523 | 0.031376  | 0.078204  |
| 6  | 1.854711  | -1.654984 | -0.301210 |
| 6  | 2.897763  | 0.918713  | 0.175113  |
| 6  | -3.158878 | -0.788016 | -0.147488 |
| 6  | -1.986944 | 1.390414  | -0.485169 |
| 1  | -1.041879 | -1.431275 | 1.110697  |
| 1  | 0.109533  | 1.404074  | 1.095360  |
| 1  | 0.792318  | -0.057666 | 1.866728  |
| 1  | 2.670455  | -1.885974 | -0.986842 |
| 1  | 1.018328  | -2.302962 | -0.562171 |
| 1  | 2.183611  | -1.863103 | 0.717668  |
| 1  | 3.721553  | 0.773889  | -0.524365 |
| 1  | 3.170287  | 0.491700  | 1.140276  |
| 1  | 2.729010  | 1.989679  | 0.278262  |
| 1  | -4.020858 | -0.254542 | 0.247371  |
| 1  | -3.047187 | -1.743016 | 0.356119  |
| 1  | -3.280619 | -0.935695 | -1.218162 |
| 1  | -2.752684 | 1.422868  | -1.253325 |
| 1  | -1.018865 | 1.616583  | -0.923430 |
| 1  | -2.230263 | 2.099510  | 0.304624  |

3b

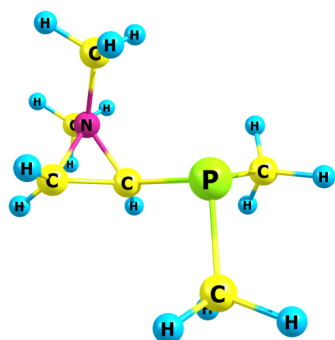

E(MP2) = -632.421868

|    |           |           |           |
|----|-----------|-----------|-----------|
| 6  | 0.143341  | -0.406178 | 0.445571  |
| 6  | 1.050578  | -1.448078 | -0.117152 |
| 15 | -1.334987 | 0.163436  | -0.512139 |
| 7  | 1.529874  | -0.051634 | -0.018249 |
| 6  | -2.455514 | -1.150245 | 0.126665  |
| 6  | 1.730559  | 0.713470  | -1.267079 |
| 6  | 2.525976  | 0.246784  | 1.030054  |
| 6  | -1.819631 | 1.573699  | 0.565053  |
| 1  | 0.091782  | -0.365991 | 1.530277  |

|   |           |           |           |
|---|-----------|-----------|-----------|
| 1 | 0.879638  | -1.777679 | -1.133223 |
| 1 | 1.552438  | -2.140467 | 0.543510  |
| 1 | -3.466376 | -0.907328 | -0.200549 |
| 1 | -2.442999 | -1.213578 | 1.214783  |
| 1 | -2.185894 | -2.112780 | -0.305339 |
| 1 | 1.660396  | 1.773657  | -1.034402 |
| 1 | 0.963250  | 0.439274  | -1.983743 |
| 1 | 2.720205  | 0.472900  | -1.648939 |
| 1 | 2.443677  | 1.298690  | 1.292765  |
| 1 | 3.516553  | 0.029671  | 0.636738  |
| 1 | 2.323650  | -0.373546 | 1.898732  |
| 1 | -2.798368 | 1.926744  | 0.240261  |
| 1 | -1.115773 | 2.396685  | 0.444928  |
| 1 | -1.878356 | 1.286926  | 1.615364  |

4a

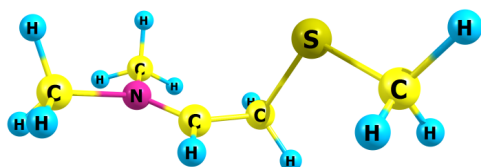

E(MP2) = -649.4341745

|    |           |           |           |
|----|-----------|-----------|-----------|
| 6  | 0.457675  | -0.350185 | 0.607807  |
| 6  | -0.577468 | 0.661521  | 0.864330  |
| 7  | 1.638379  | -0.140098 | 0.124772  |
| 16 | -1.660625 | 0.417655  | -0.594449 |
| 6  | 2.498667  | -1.260376 | -0.277953 |
| 6  | 2.178014  | 1.190095  | -0.179633 |
| 6  | -2.823846 | -0.792995 | 0.082845  |
| 1  | 0.190506  | -1.390448 | 0.757341  |
| 1  | -0.230295 | 1.688655  | 0.871255  |
| 1  | -1.137529 | 0.448669  | 1.772265  |
| 1  | 2.695264  | -1.174632 | -1.345174 |
| 1  | 1.998572  | -2.199779 | -0.065971 |
| 1  | 3.434100  | -1.196339 | 0.272508  |
| 1  | 1.991451  | 1.408371  | -1.230538 |
| 1  | 3.248635  | 1.166217  | 0.002265  |
| 1  | 1.721981  | 1.944848  | 0.449041  |
| 1  | -3.363480 | -0.360646 | 0.921544  |
| 1  | -2.324741 | -1.714362 | 0.372237  |
| 1  | -3.521366 | -1.010715 | -0.723377 |

4b

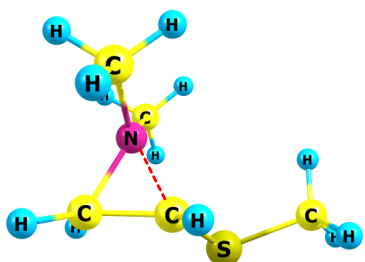

E(MP2) = -649.4148925

|    |           |           |           |
|----|-----------|-----------|-----------|
| 6  | 0.070356  | 0.467390  | -0.623320 |
| 6  | -1.030590 | 1.378122  | -0.224024 |
| 16 | 1.599862  | 0.532691  | 0.221576  |
| 6  | 2.317045  | -1.037311 | -0.332149 |
| 1  | 0.091581  | 0.142578  | -1.657704 |
| 1  | -0.890475 | 1.980019  | 0.663893  |
| 1  | -1.698141 | 1.772938  | -0.976596 |
| 1  | 3.333101  | -1.049807 | 0.055664  |
| 1  | 2.349598  | -1.070328 | -1.418334 |
| 1  | 1.768197  | -1.883011 | 0.072474  |
| 7  | -1.197295 | -0.068366 | 0.058067  |
| 6  | -1.153428 | -0.512712 | 1.462513  |
| 6  | -2.142293 | -0.813044 | -0.795223 |
| 1  | -2.124585 | -0.312886 | 1.909598  |
| 1  | -0.370104 | 0.028577  | 1.984032  |
| 1  | -0.939972 | -1.578839 | 1.478080  |
| 1  | -3.146308 | -0.681235 | -0.397336 |
| 1  | -1.864384 | -1.864056 | -0.783683 |
| 1  | -2.091763 | -0.423125 | -1.808553 |

5a

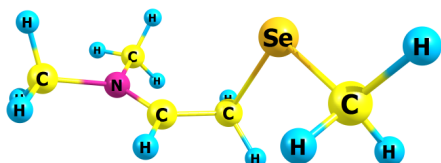

E(MP2) = -2651.8321761

|    |           |           |           |
|----|-----------|-----------|-----------|
| 6  | -0.908317 | 0.531836  | 0.670031  |
| 6  | 0.114814  | -0.382452 | 1.171453  |
| 7  | -2.030576 | 0.181217  | 0.127333  |
| 34 | 1.340183  | -0.366322 | -0.369922 |
| 6  | -2.899829 | 1.166977  | -0.523688 |
| 6  | -2.422191 | -1.225601 | -0.024229 |
| 6  | 2.430319  | 1.127494  | 0.207513  |
| 1  | -0.704139 | 1.596300  | 0.694213  |
| 1  | -0.208162 | -1.402517 | 1.344543  |
| 1  | 0.644457  | 0.011116  | 2.034068  |

|   |           |           |           |
|---|-----------|-----------|-----------|
| 1 | -2.945776 | 0.937948  | -1.587191 |
| 1 | -2.495223 | 2.163157  | -0.375570 |
| 1 | -3.894473 | 1.096319  | -0.090353 |
| 1 | -1.829790 | -1.674072 | -0.822218 |
| 1 | -3.473680 | -1.258748 | -0.289589 |
| 1 | -2.268894 | -1.762628 | 0.906444  |
| 1 | 3.178797  | 1.257162  | -0.570852 |
| 1 | 2.915020  | 0.877485  | 1.146343  |
| 1 | 1.840904  | 2.035391  | 0.289693  |

5b

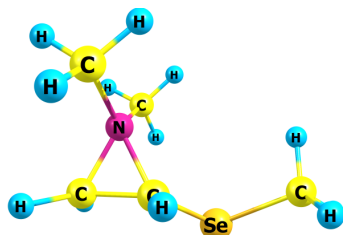

E(MP2) = -2651.8082235

|    |           |           |           |
|----|-----------|-----------|-----------|
| 6  | 0.344971  | -0.243820 | -0.734702 |
| 6  | 1.368001  | -1.293605 | -0.503305 |
| 34 | -1.351069 | -0.371250 | 0.079224  |
| 6  | -1.884045 | 1.469625  | -0.214933 |
| 7  | 1.606347  | 0.053278  | 0.070100  |
| 6  | 1.537210  | 0.209713  | 1.533840  |
| 6  | 2.626060  | 0.891418  | -0.588848 |
| 1  | 0.385037  | 0.274729  | -1.685359 |
| 1  | 1.161660  | -2.050762 | 0.241314  |
| 1  | 2.042487  | -1.570772 | -1.300909 |
| 1  | -2.924019 | 1.526986  | 0.096636  |
| 1  | -1.810632 | 1.703125  | -1.273130 |
| 1  | -1.284953 | 2.143258  | 0.388949  |
| 1  | 2.478439  | -0.135933 | 1.954959  |
| 1  | 0.703545  | -0.372643 | 1.913757  |
| 1  | 1.382800  | 1.262466  | 1.758305  |
| 1  | 3.602695  | 0.627257  | -0.188982 |
| 1  | 2.400724  | 1.934854  | -0.382550 |
| 1  | 2.600969  | 0.706992  | -1.659625 |

6a

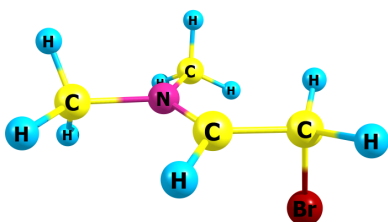

E(MP2) = -2784.5877745



|    |           |           |           |
|----|-----------|-----------|-----------|
| 6  | 0.810298  | -0.787936 | -0.502692 |
| 6  | -0.406573 | -0.280942 | -1.168711 |
| 35 | -1.646925 | 0.032311  | 0.281933  |
| 7  | 1.765465  | -0.045063 | -0.063358 |
| 6  | 2.934077  | -0.624770 | 0.613547  |
| 6  | 1.753990  | 1.422449  | -0.167389 |
| 1  | 0.906131  | -1.853933 | -0.328865 |
| 1  | -0.266656 | 0.646313  | -1.712660 |
| 1  | -0.838182 | -1.040828 | -1.811617 |
| 1  | 3.829347  | -0.266754 | 0.110161  |
| 1  | 2.883038  | -1.707702 | 0.568182  |
| 1  | 2.933218  | -0.284719 | 1.646824  |
| 1  | 2.298641  | 1.716944  | -1.062494 |
| 1  | 2.256007  | 1.817792  | 0.710864  |
| 1  | 0.731826  | 1.784642  | -0.193084 |

6b

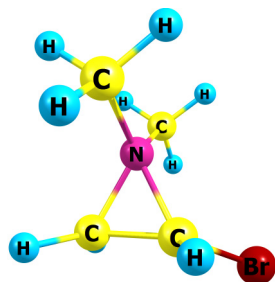

E(MP2) = -2784.5627648

|    |           |           |           |
|----|-----------|-----------|-----------|
| 6  | 0.144588  | -0.775112 | -0.117216 |
| 6  | 0.965230  | -0.895243 | 1.108450  |
| 35 | -1.533069 | 0.043044  | -0.113610 |
| 7  | 1.375246  | 0.067706  | 0.047213  |
| 6  | 1.259550  | 1.514792  | 0.326752  |
| 6  | 2.532945  | -0.296678 | -0.797741 |
| 1  | 0.261813  | -1.516952 | -0.894524 |
| 1  | 0.602825  | -0.419264 | 2.008614  |
| 1  | 1.623096  | -1.744650 | 1.226191  |
| 1  | 2.173832  | 1.825281  | 0.826474  |
| 1  | 0.398656  | 1.693242  | 0.961408  |
| 1  | 1.140892  | 2.036607  | -0.619555 |
| 1  | 3.440246  | 0.010347  | -0.282944 |
| 1  | 2.437934  | 0.220598  | -1.749232 |
| 1  | 2.537525  | -1.372252 | -0.952049 |

7a

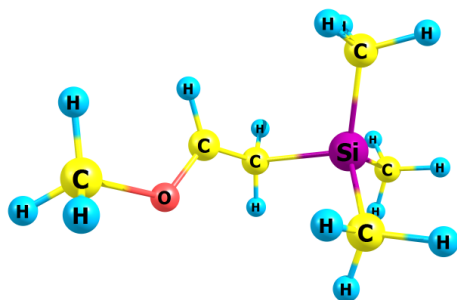

E(MP2) = -601.068947

|    |           |           |           |
|----|-----------|-----------|-----------|
| 6  | 1.338743  | 0.858454  | -0.174301 |
| 6  | 0.147090  | 1.313742  | 0.395005  |
| 14 | -1.210895 | -0.149327 | -0.030064 |
| 8  | 2.194358  | 0.191545  | 0.506245  |
| 6  | -1.272625 | -0.298516 | -1.887700 |
| 6  | -2.753041 | 0.565105  | 0.725115  |
| 6  | -0.568370 | -1.673682 | 0.825396  |
| 6  | 3.372289  | -0.360586 | -0.160438 |
| 1  | 1.546079  | 1.002665  | -1.235525 |
| 1  | 0.134073  | 1.363618  | 1.480114  |
| 1  | -0.286537 | 2.163586  | -0.124991 |
| 1  | -2.087700 | -0.969734 | -2.165162 |
| 1  | -0.354450 | -0.717348 | -2.300746 |
| 1  | -1.465882 | 0.663148  | -2.364052 |
| 1  | -3.576698 | -0.136393 | 0.577858  |
| 1  | -3.028960 | 1.508684  | 0.255028  |
| 1  | -2.637309 | 0.725951  | 1.796556  |
| 1  | -1.314341 | -2.467042 | 0.746560  |
| 1  | -0.386642 | -1.493954 | 1.885146  |
| 1  | 0.350942  | -2.044866 | 0.372257  |
| 1  | 3.321113  | -1.436406 | -0.035145 |
| 1  | 4.232900  | 0.049513  | 0.355113  |
| 1  | 3.366563  | -0.080308 | -1.210544 |

7b

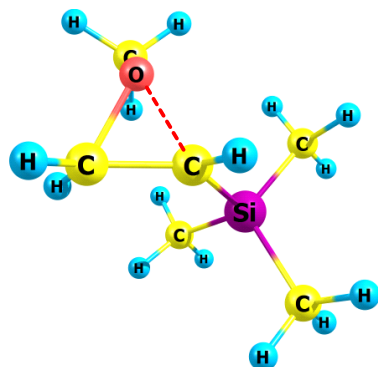

E(MP2) = -601.0129212

|   |          |           |           |
|---|----------|-----------|-----------|
| 6 | 0.610446 | -0.805352 | -0.591865 |
|---|----------|-----------|-----------|

|    |           |           |           |
|----|-----------|-----------|-----------|
| 6  | 1.678372  | -1.383175 | 0.239086  |
| 14 | -1.005576 | 0.079121  | 0.023510  |
| 6  | -2.278190 | -1.194379 | -0.468818 |
| 6  | -1.159553 | 1.682897  | -0.919519 |
| 6  | -0.933923 | 0.307070  | 1.879185  |
| 8  | 2.012404  | -0.176573 | -0.565991 |
| 6  | 2.221551  | 1.081529  | 0.168860  |
| 1  | 0.541313  | -1.253986 | -1.578665 |
| 1  | 1.683243  | -1.177331 | 1.301622  |
| 1  | 2.255837  | -2.230812 | -0.100636 |
| 1  | -3.268151 | -0.846159 | -0.169492 |
| 1  | -2.105220 | -2.153349 | 0.020332  |
| 1  | -2.294209 | -1.351844 | -1.547338 |
| 1  | -2.154444 | 2.099233  | -0.751884 |
| 1  | -1.044449 | 1.529698  | -1.992853 |
| 1  | -0.437576 | 2.431329  | -0.594081 |
| 1  | -1.935303 | 0.577518  | 2.221422  |
| 1  | -0.267033 | 1.104054  | 2.207020  |
| 1  | -0.662470 | -0.615008 | 2.394906  |
| 1  | 3.262293  | 1.066345  | 0.474943  |
| 1  | 1.548686  | 1.123011  | 1.019263  |
| 1  | 2.024091  | 1.870658  | -0.547346 |

8a

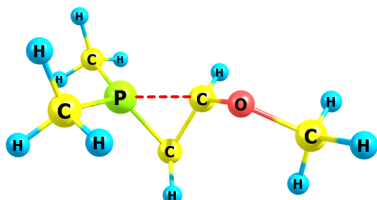

E(MP2) = -613.0469329

|    |           |           |           |
|----|-----------|-----------|-----------|
| 6  | 0.700761  | 0.585340  | 0.264203  |
| 6  | 0.180064  | 0.759374  | -1.180334 |
| 8  | 1.629602  | -0.402545 | 0.489283  |
| 15 | -0.971537 | -0.025515 | -0.046954 |
| 6  | 2.960922  | 0.045817  | 0.164100  |
| 6  | -2.391039 | 0.912208  | 0.525864  |
| 6  | -1.146488 | -1.806261 | -0.156029 |
| 1  | 0.792977  | 1.498630  | 0.851421  |
| 1  | 0.622986  | 0.099978  | -1.918098 |
| 1  | -0.054292 | 1.759790  | -1.523119 |
| 1  | 3.616520  | -0.792315 | 0.370932  |
| 1  | 3.231282  | 0.896392  | 0.789981  |
| 1  | 3.024552  | 0.321171  | -0.889247 |
| 1  | -3.211683 | 0.790166  | -0.179876 |
| 1  | -2.112875 | 1.963053  | 0.586616  |

|   |           |           |           |
|---|-----------|-----------|-----------|
| 1 | -2.687022 | 0.550684  | 1.509374  |
| 1 | -1.848738 | -2.062028 | -0.947284 |
| 1 | -1.502171 | -2.184550 | 0.801218  |
| 1 | -0.160612 | -2.216763 | -0.368696 |

8b

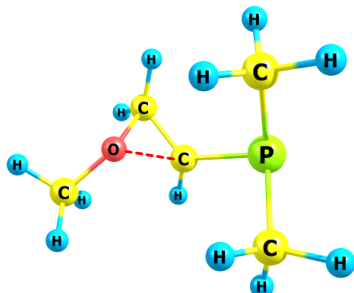

E(MP2) = -613.0017007

|    |           |           |           |
|----|-----------|-----------|-----------|
| 6  | -0.418133 | 0.057362  | -0.787323 |
| 6  | -1.327688 | 1.170858  | -0.508485 |
| 8  | -1.376759 | 0.063825  | 0.486191  |
| 15 | 1.381129  | 0.088106  | -0.556025 |
| 6  | -2.570163 | -0.798766 | 0.415401  |
| 6  | 1.603086  | -1.587679 | 0.168292  |
| 6  | 1.536481  | 1.172003  | 0.918956  |
| 1  | -0.799923 | -0.695879 | -1.470378 |
| 1  | -0.945936 | 2.068299  | -0.042407 |
| 1  | -2.248796 | 1.271730  | -1.067808 |
| 1  | -2.271762 | -1.744789 | 0.852661  |
| 1  | -2.876883 | -0.913072 | -0.621625 |
| 1  | -3.332031 | -0.301825 | 1.007391  |
| 1  | 2.660505  | -1.712486 | 0.398028  |
| 1  | 1.331303  | -2.344620 | -0.566325 |
| 1  | 1.023395  | -1.720384 | 1.080934  |
| 1  | 2.571595  | 1.097235  | 1.252456  |
| 1  | 0.883586  | 0.868632  | 1.736302  |
| 1  | 1.360581  | 2.212305  | 0.650575  |

9a

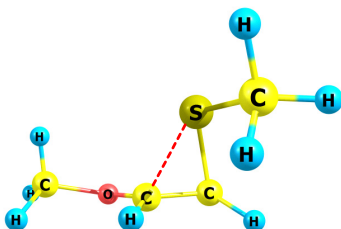

E(MP2) = -630.0370521

|    |           |           |           |
|----|-----------|-----------|-----------|
| 6  | 0.566052  | 0.353391  | 0.514722  |
| 6  | -0.431487 | 1.364478  | 0.198966  |
| 8  | 1.721273  | 0.412706  | -0.086808 |
| 16 | -1.034717 | -0.133640 | -0.685806 |

|   |           |           |           |
|---|-----------|-----------|-----------|
| 6 | 2.555585  | -0.774159 | 0.022340  |
| 6 | -2.238269 | -0.759927 | 0.512782  |
| 1 | 0.449640  | -0.289917 | 1.384610  |
| 1 | -0.120044 | 2.133421  | -0.498224 |
| 1 | -1.113393 | 1.677870  | 0.979345  |
| 1 | 3.535616  | -0.472595 | -0.324652 |
| 1 | 2.138718  | -1.548850 | -0.617442 |
| 1 | 2.595712  | -1.097146 | 1.060382  |
| 1 | -3.102643 | -0.101329 | 0.508714  |
| 1 | -1.794165 | -0.811235 | 1.504365  |
| 1 | -2.515437 | -1.756316 | 0.177394  |

9c

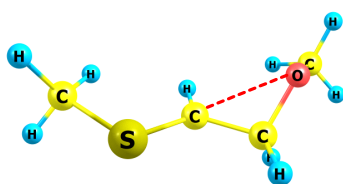

E(MP2) = -630.0099744

|    |           |           |           |
|----|-----------|-----------|-----------|
| 6  | 0.141532  | 0.045694  | 0.372932  |
| 6  | -1.089972 | -0.798322 | 0.317089  |
| 8  | -1.914916 | -0.114562 | -0.596039 |
| 16 | 1.576770  | -0.522802 | -0.123369 |
| 6  | -2.917657 | 0.692698  | 0.040056  |
| 6  | 2.722518  | 0.866682  | -0.015420 |
| 1  | 0.038979  | 1.089037  | 0.658573  |
| 1  | -0.878945 | -1.798072 | -0.062955 |
| 1  | -1.532780 | -0.882069 | 1.314954  |
| 1  | -3.470015 | 1.171882  | -0.760498 |
| 1  | -2.467915 | 1.455708  | 0.679414  |
| 1  | -3.582734 | 0.062855  | 0.631256  |
| 1  | 3.517636  | 0.570438  | 0.665226  |
| 1  | 2.203685  | 1.750373  | 0.342822  |
| 1  | 3.124568  | 1.020671  | -1.014520 |

10a

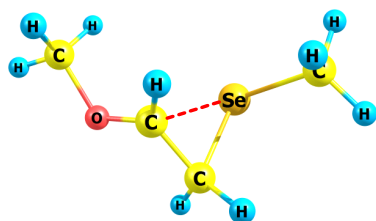

E(MP2) = -2632.4370805

|   |           |          |           |
|---|-----------|----------|-----------|
| 6 | 0.925188  | 0.476328 | 0.566640  |
| 6 | -0.037826 | 1.487617 | 0.175199  |
| 8 | 2.040946  | 0.385531 | -0.106605 |



|    |           |           |           |
|----|-----------|-----------|-----------|
| 35 | 1.349954  | -0.303589 | -0.014682 |
| 8  | -1.866330 | 0.236997  | -0.398151 |
| 6  | -2.981150 | -0.626036 | 0.039416  |
| 1  | -1.042068 | 0.266798  | 1.460301  |
| 1  | 0.134337  | 1.642319  | -1.081243 |
| 1  | 0.608082  | 1.997476  | 0.643962  |
| 1  | -3.880782 | -0.109413 | -0.271776 |
| 1  | -2.931175 | -0.756864 | 1.116234  |
| 1  | -2.851213 | -1.560122 | -0.495416 |

11b

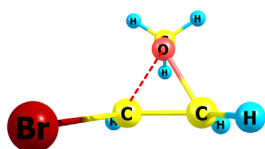

E(MP2) = -2765.1376794

|    |           |           |           |
|----|-----------|-----------|-----------|
| 6  | 0.333422  | 0.224998  | 0.549118  |
| 6  | 1.146906  | 1.298463  | -0.016522 |
| 8  | 1.421801  | -0.103474 | -0.477419 |
| 35 | -1.377342 | -0.129857 | -0.035655 |
| 6  | 2.652810  | -0.751409 | 0.037746  |
| 1  | 0.593340  | -0.180639 | 1.518198  |
| 1  | 0.749915  | 1.882315  | -0.834778 |
| 1  | 1.957468  | 1.717103  | 0.565312  |
| 1  | 3.437266  | -0.454459 | -0.649630 |
| 1  | 2.451348  | -1.815726 | -0.004910 |
| 1  | 2.844412  | -0.408125 | 1.051020  |

12a

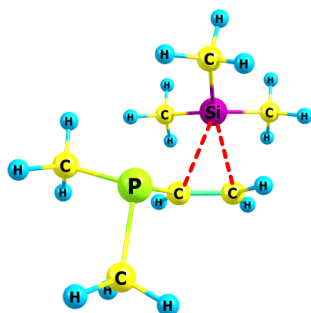

E(MP2) = -906.6596027

|    |           |           |           |
|----|-----------|-----------|-----------|
| 6  | 0.554719  | 0.647621  | -0.649944 |
| 6  | -0.312870 | 1.652923  | -0.333437 |
| 14 | -1.646312 | -0.150416 | 0.054354  |
| 15 | 1.814386  | 0.019481  | 0.542069  |
| 6  | -1.559765 | -1.405903 | -1.312590 |
| 6  | -3.142815 | 0.952218  | -0.051220 |
| 6  | -1.255263 | -0.745747 | 1.763040  |
| 6  | 2.205424  | -1.588806 | -0.265172 |

|   |           |           |           |
|---|-----------|-----------|-----------|
| 6 | 3.167649  | 1.063318  | -0.168347 |
| 1 | 0.574002  | 0.299711  | -1.682861 |
| 1 | -0.320034 | 2.072023  | 0.669523  |
| 1 | -0.886311 | 2.167397  | -1.096208 |
| 1 | -2.409409 | -2.082517 | -1.185859 |
| 1 | -0.649302 | -2.001473 | -1.284034 |
| 1 | -1.654481 | -0.938712 | -2.292804 |
| 1 | -4.005525 | 0.326722  | 0.196524  |
| 1 | -3.293778 | 1.348236  | -1.054034 |
| 1 | -3.107348 | 1.772554  | 0.663520  |
| 1 | -2.150327 | -1.257474 | 2.129439  |
| 1 | -1.037934 | 0.076104  | 2.444170  |
| 1 | -0.425866 | -1.449073 | 1.789543  |
| 1 | 3.141908  | -1.952166 | 0.158859  |
| 1 | 2.323519  | -1.493083 | -1.345005 |
| 1 | 1.436784  | -2.326923 | -0.039427 |
| 1 | 4.097489  | 0.732361  | 0.295473  |
| 1 | 3.003721  | 2.106057  | 0.096992  |
| 1 | 3.252982  | 0.960126  | -1.249780 |

12b

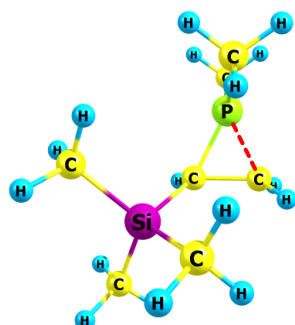

E(MP2) = -906.6927723

|    |           |           |           |
|----|-----------|-----------|-----------|
| 6  | -0.130409 | -0.875815 | 0.086269  |
| 6  | -0.903881 | -1.101483 | -1.245951 |
| 14 | 1.575805  | 0.012709  | 0.128737  |
| 6  | 1.525974  | 1.235920  | 1.544169  |
| 6  | 2.829252  | -1.343920 | 0.396734  |
| 6  | 1.830287  | 0.853318  | -1.527275 |
| 1  | -0.196479 | -1.720256 | 0.770740  |
| 1  | -0.498716 | -0.615364 | -2.125128 |
| 1  | -1.354474 | -2.070650 | -1.422118 |
| 1  | 2.503968  | 1.701148  | 1.676126  |
| 1  | 1.267024  | 0.741992  | 2.481664  |
| 1  | 0.805482  | 2.035678  | 1.366698  |
| 1  | 3.837710  | -0.927862 | 0.406081  |
| 1  | 2.782672  | -2.088407 | -0.398562 |
| 1  | 2.668323  | -1.848731 | 1.349745  |



|    |           |           |           |
|----|-----------|-----------|-----------|
| 1  | 2.802964  | 1.349204  | -1.520101 |
| 1  | 1.088336  | 1.618102  | -1.758609 |
| 1  | 1.845220  | 0.129906  | -2.343648 |
| 15 | -1.702814 | -0.049506 | -0.050143 |
| 6  | -3.113770 | -0.721876 | 0.835273  |
| 6  | -1.785699 | 1.722853  | -0.326540 |
| 1  | -3.160490 | -0.282803 | 1.830778  |
| 1  | -2.989443 | -1.800359 | 0.915826  |
| 1  | -4.028274 | -0.495998 | 0.288602  |
| 1  | -1.818634 | 2.234131  | 0.634773  |
| 1  | -2.682100 | 1.955091  | -0.900142 |
| 1  | -0.902683 | 2.035861  | -0.878958 |

13a

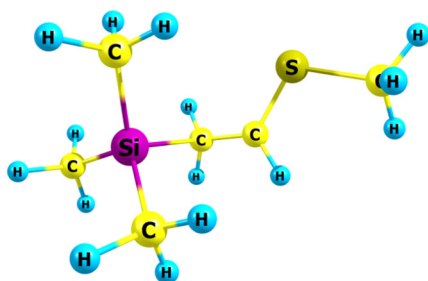

E(MP2) = -923.6739944

|    |           |           |           |
|----|-----------|-----------|-----------|
| 6  | -1.021193 | -0.028964 | -0.912111 |
| 6  | 0.188858  | -0.686576 | -1.193493 |
| 14 | 1.525766  | 0.093749  | 0.135217  |
| 16 | -2.215387 | -0.648574 | 0.064554  |
| 6  | 1.400992  | 1.949774  | -0.001882 |
| 6  | 3.127122  | -0.607875 | -0.503934 |
| 6  | 1.014190  | -0.574402 | 1.796272  |
| 6  | -3.389065 | 0.725966  | 0.197277  |
| 1  | -1.185161 | 0.968819  | -1.313699 |
| 1  | 0.229562  | -1.752919 | -0.982141 |
| 1  | 0.646081  | -0.390764 | -2.135585 |
| 1  | 2.205520  | 2.408742  | 0.575923  |
| 1  | 0.458368  | 2.327399  | 0.395601  |
| 1  | 1.508023  | 2.285856  | -1.033935 |
| 1  | 3.939448  | -0.299118 | 0.157212  |
| 1  | 3.351852  | -0.241809 | -1.505416 |
| 1  | 3.106950  | -1.697226 | -0.523679 |
| 1  | 1.743962  | -0.252642 | 2.542548  |
| 1  | 0.995386  | -1.664547 | 1.802578  |
| 1  | 0.039465  | -0.205016 | 2.114278  |
| 1  | -4.313243 | 0.292611  | 0.570687  |
| 1  | -3.554940 | 1.157619  | -0.785370 |
| 1  | -3.011216 | 1.460147  | 0.902322  |

13c

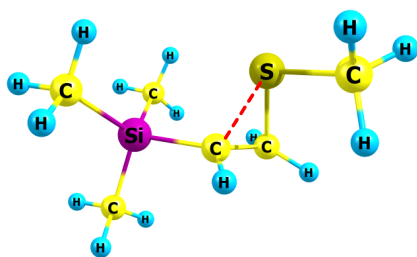

E(MP2) = -923.669494

|    |           |           |           |
|----|-----------|-----------|-----------|
| 6  | 0.402208  | 0.250153  | -0.674530 |
| 14 | -1.382372 | -0.109053 | -0.020191 |
| 16 | 1.747861  | -0.103979 | 0.537457  |
| 6  | -2.509293 | 0.759808  | -1.226564 |
| 6  | 3.153814  | -0.563797 | -0.505297 |
| 6  | -1.559037 | -1.965790 | -0.021201 |
| 6  | -1.444422 | 0.623543  | 1.700647  |
| 6  | 1.175776  | 1.442601  | -0.256199 |
| 1  | 0.683927  | -0.164733 | -1.639674 |
| 1  | -3.548835 | 0.611960  | -0.929326 |
| 1  | -2.394016 | 0.365284  | -2.236247 |
| 1  | -2.320405 | 1.833259  | -1.250035 |
| 1  | 3.174347  | -1.649530 | -0.555437 |
| 1  | 4.053400  | -0.186109 | -0.025333 |
| 1  | 3.026304  | -0.132469 | -1.494681 |
| 1  | -2.557925 | -2.245693 | 0.316545  |
| 1  | -0.841036 | -2.436454 | 0.651639  |
| 1  | -1.421114 | -2.379155 | -1.020756 |
| 1  | -2.415360 | 0.397683  | 2.145537  |
| 1  | -1.342844 | 1.709441  | 1.695102  |
| 1  | -0.686654 | 0.201869  | 2.363525  |
| 1  | 1.924051  | 1.872004  | -0.911193 |
| 1  | 0.739309  | 2.113955  | 0.472573  |

14a

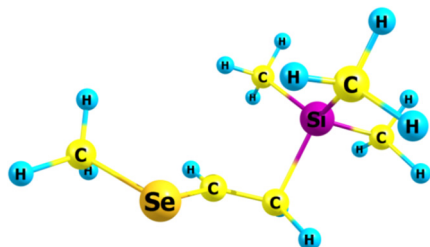

E(MP2) = -2926.0648408

|    |           |           |           |
|----|-----------|-----------|-----------|
| 6  | -0.534818 | 0.168212  | -0.978725 |
| 6  | 0.639759  | -0.530453 | -1.296077 |
| 14 | 1.951237  | 0.092627  | 0.146722  |

|    |           |           |           |
|----|-----------|-----------|-----------|
| 34 | -1.872479 | -0.462544 | 0.032740  |
| 6  | 1.759613  | 1.941275  | 0.305488  |
| 6  | 3.580942  | -0.445473 | -0.573832 |
| 6  | 1.440797  | -0.845363 | 1.671340  |
| 6  | -2.947073 | 1.141494  | 0.192313  |
| 1  | -0.642461 | 1.194889  | -1.320830 |
| 1  | 0.637993  | -1.609013 | -1.153841 |
| 1  | 1.140779  | -0.189232 | -2.199418 |
| 1  | 2.537647  | 2.329522  | 0.965543  |
| 1  | 0.796676  | 2.212150  | 0.739935  |
| 1  | 1.866692  | 2.443658  | -0.656623 |
| 1  | 4.375421  | -0.229829 | 0.143622  |
| 1  | 3.805418  | 0.090421  | -1.495697 |
| 1  | 3.593298  | -1.516076 | -0.776602 |
| 1  | 2.084923  | -0.549886 | 2.502219  |
| 1  | 1.549094  | -1.921213 | 1.532795  |
| 1  | 0.412988  | -0.630354 | 1.964569  |
| 1  | -3.953318 | 0.808890  | 0.430525  |
| 1  | -2.942830 | 1.661882  | -0.760370 |
| 1  | -2.550659 | 1.755759  | 0.993850  |

14b

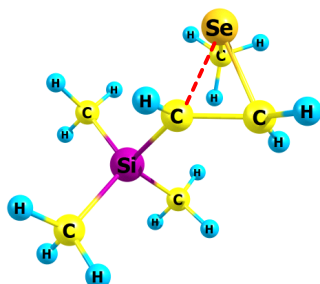

E(MP2) = -2926.0662408

|    |           |           |           |
|----|-----------|-----------|-----------|
| 6  | -0.038807 | 0.966059  | -0.170726 |
| 6  | 0.845389  | 1.361245  | 0.941475  |
| 14 | -1.656788 | -0.087112 | -0.045694 |
| 34 | 1.773166  | 0.181792  | -0.329479 |
| 6  | -2.969426 | 1.144703  | -0.537329 |
| 6  | -1.874881 | -0.631226 | 1.732887  |
| 6  | -1.507311 | -1.505007 | -1.252899 |
| 6  | 1.598260  | -1.507161 | 0.591910  |
| 1  | -0.066246 | 1.705391  | -0.971414 |
| 1  | 0.726899  | 0.872269  | 1.901177  |
| 1  | 1.292220  | 2.347393  | 0.961402  |
| 1  | -3.953823 | 0.677186  | -0.481716 |
| 1  | -2.824201 | 1.494807  | -1.559670 |
| 1  | -2.974595 | 2.009535  | 0.126765  |
| 1  | -2.878815 | -1.048618 | 1.837348  |

|   |           |           |           |
|---|-----------|-----------|-----------|
| 1 | -1.809123 | 0.215537  | 2.417826  |
| 1 | -1.180105 | -1.401726 | 2.065842  |
| 1 | -2.462739 | -2.026689 | -1.328320 |
| 1 | -0.760588 | -2.237203 | -0.946374 |
| 1 | -1.249943 | -1.143853 | -2.249493 |
| 1 | 1.599261  | -2.285403 | -0.165727 |
| 1 | 0.671278  | -1.509251 | 1.153889  |
| 1 | 2.458565  | -1.602399 | 1.248534  |

### 15a

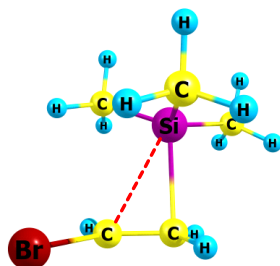

E(MP2) = -3058.8077

|    |           |           |           |
|----|-----------|-----------|-----------|
| 6  | 0.658232  | 1.055051  | -0.389039 |
| 6  | -0.256360 | 1.527991  | 0.502272  |
| 14 | -1.576221 | -0.216721 | -0.017887 |
| 35 | 2.016850  | -0.098866 | 0.033991  |
| 6  | -1.253445 | -0.838263 | -1.736580 |
| 6  | -3.159206 | 0.730603  | 0.180494  |
| 6  | -1.122771 | -1.370539 | 1.356029  |
| 1  | 0.624791  | 1.342574  | -1.433486 |
| 1  | -0.145454 | 1.336742  | 1.563216  |
| 1  | -0.905794 | 2.334896  | 0.183601  |
| 1  | -1.998529 | -1.612988 | -1.939057 |
| 1  | -0.269329 | -1.292725 | -1.841030 |
| 1  | -1.380916 | -0.060293 | -2.488690 |
| 1  | -3.981278 | 0.015802  | 0.081996  |
| 1  | -3.279486 | 1.485904  | -0.595239 |
| 1  | -3.235818 | 1.199369  | 1.160339  |
| 1  | -1.751248 | -2.260153 | 1.257749  |
| 1  | -1.313709 | -0.930712 | 2.333839  |
| 1  | -0.084587 | -1.693073 | 1.298435  |

### 15b

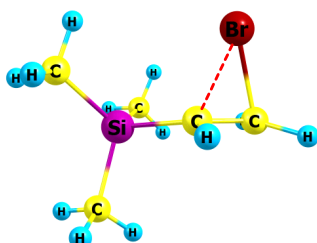

E(MP2) = -3058.7882653

|    |           |           |           |
|----|-----------|-----------|-----------|
| 6  | 0.136700  | 0.598179  | -0.761624 |
| 6  | 1.020556  | 1.558575  | -0.107119 |
| 14 | -1.493028 | -0.092627 | 0.040777  |
| 35 | 1.806252  | -0.264850 | -0.010050 |
| 6  | -1.552135 | -1.896887 | -0.415989 |
| 6  | -2.811448 | 0.949120  | -0.769606 |
| 6  | -1.314999 | 0.211271  | 1.874046  |
| 1  | 0.269240  | 0.544884  | -1.840379 |
| 1  | 0.797779  | 1.870290  | 0.905488  |
| 1  | 1.673333  | 2.194770  | -0.692447 |
| 1  | -2.493565 | -2.331190 | -0.076115 |
| 1  | -0.743506 | -2.456885 | 0.054905  |
| 1  | -1.493623 | -2.039583 | -1.495359 |
| 1  | -3.788476 | 0.652792  | -0.383364 |
| 1  | -2.826817 | 0.809419  | -1.850519 |
| 1  | -2.679872 | 2.009895  | -0.555828 |
| 1  | -2.180868 | -0.212950 | 2.385934  |
| 1  | -1.291760 | 1.274059  | 2.117469  |
| 1  | -0.430347 | -0.270539 | 2.292859  |

**16a**

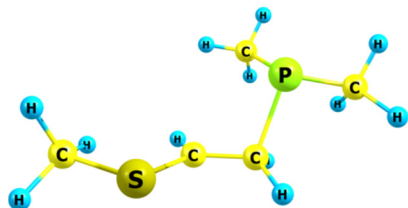

E(MP2) = -935.6474477

|    |           |           |           |
|----|-----------|-----------|-----------|
| 6  | -0.852519 | 0.182855  | 0.708935  |
| 6  | 0.397729  | 0.884543  | 0.711747  |
| 15 | 1.520806  | -0.038369 | -0.597147 |
| 16 | -2.081707 | 0.581826  | -0.306292 |
| 6  | 1.600431  | -1.698635 | 0.195177  |
| 6  | 3.117897  | 0.651880  | -0.012039 |
| 6  | -3.322456 | -0.708711 | -0.051847 |
| 1  | -0.976036 | -0.696815 | 1.335399  |
| 1  | 0.344477  | 1.907084  | 0.342204  |
| 1  | 0.910647  | 0.804746  | 1.668796  |
| 1  | 2.412790  | -2.243122 | -0.288463 |
| 1  | 0.683586  | -2.261352 | 0.022580  |
| 1  | 1.811264  | -1.641669 | 1.263922  |
| 1  | 3.905220  | 0.173744  | -0.597706 |
| 1  | 3.295500  | 0.459345  | 1.045583  |
| 1  | 3.155143  | 1.722070  | -0.209850 |
| 1  | -4.277961 | -0.207301 | 0.078412  |
| 1  | -3.072372 | -1.292491 | 0.829023  |
| 1  | -3.343519 | -1.329511 | -0.943859 |

16b

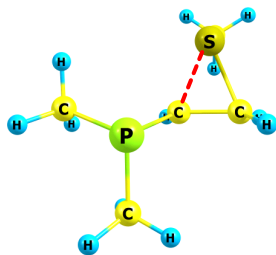

E(MP2) = -935.6511891

|    |           |           |           |
|----|-----------|-----------|-----------|
| 6  | -0.126884 | -0.318306 | 0.384081  |
| 6  | -0.960401 | -1.446155 | -0.088470 |
| 16 | -1.622389 | 0.189302  | -0.580569 |
| 15 | 1.447842  | 0.042555  | -0.531479 |
| 6  | -2.864866 | 0.482797  | 0.704217  |
| 6  | 2.515615  | -1.027916 | 0.521283  |
| 6  | 1.791752  | 1.695713  | 0.192338  |
| 1  | -0.235878 | -0.027131 | 1.427191  |
| 1  | -0.617564 | -2.001871 | -0.953366 |
| 1  | -1.612315 | -1.969191 | 0.599889  |
| 1  | -2.897490 | 1.555501  | 0.877323  |
| 1  | -2.588217 | -0.049054 | 1.610479  |
| 1  | -3.817767 | 0.128444  | 0.318469  |
| 1  | 3.549834  | -0.850267 | 0.225333  |
| 1  | 2.291507  | -2.077280 | 0.334762  |
| 1  | 2.408293  | -0.805065 | 1.582802  |
| 1  | 2.788858  | 2.000365  | -0.125584 |
| 1  | 1.756372  | 1.685666  | 1.281827  |
| 1  | 1.083667  | 2.425933  | -0.198532 |

17a

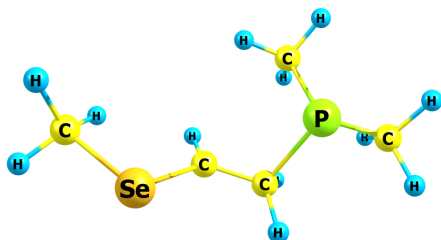

E(MP2) = -2938.0382325

|    |           |           |           |
|----|-----------|-----------|-----------|
| 6  | 0.358097  | -0.061933 | 0.848652  |
| 6  | -0.858305 | -0.817257 | 0.843686  |
| 15 | -1.934676 | -0.004473 | -0.574754 |
| 34 | 1.718366  | -0.420663 | -0.227026 |
| 6  | -2.002771 | 1.729040  | 0.042460  |
| 6  | -3.568372 | -0.598474 | 0.012303  |
| 6  | 2.886364  | 1.077584  | 0.131945  |
| 1  | 0.431721  | 0.834420  | 1.458113  |
| 1  | -0.758792 | -1.854720 | 0.529918  |

|   |           |           |           |
|---|-----------|-----------|-----------|
| 1 | -1.422390 | -0.707574 | 1.768360  |
| 1 | -2.782184 | 2.238450  | -0.526020 |
| 1 | -1.064707 | 2.249533  | -0.147467 |
| 1 | -2.255499 | 1.784617  | 1.102116  |
| 1 | -4.322497 | -0.167214 | -0.648839 |
| 1 | -3.780420 | -0.295640 | 1.037268  |
| 1 | -3.623050 | -1.682420 | -0.076958 |
| 1 | 2.928451  | 1.683847  | -0.768147 |
| 1 | 3.865558  | 0.671116  | 0.367172  |
| 1 | 2.489420  | 1.641463  | 0.970398  |

17b

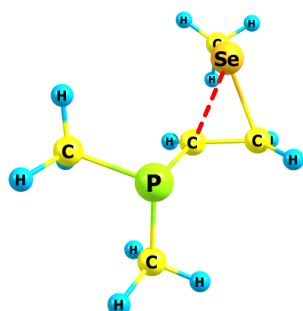

E(MP2) = -2938.0513367

|    |           |           |           |
|----|-----------|-----------|-----------|
| 6  | 0.284861  | -0.413944 | 0.473085  |
| 6  | -0.517100 | -1.544812 | -0.022204 |
| 34 | -1.381273 | 0.173799  | -0.433415 |
| 15 | 1.785246  | 0.080040  | -0.495481 |
| 6  | -2.574137 | 0.255882  | 1.091740  |
| 6  | 2.960381  | -1.000892 | 0.424021  |
| 6  | 2.092778  | 1.698597  | 0.316563  |
| 1  | 0.214671  | -0.185081 | 1.535123  |
| 1  | -0.198547 | -2.031712 | -0.936596 |
| 1  | -1.110736 | -2.137462 | 0.662801  |
| 1  | -2.670523 | 1.301932  | 1.367769  |
| 1  | -2.143624 | -0.323200 | 1.903501  |
| 1  | -3.529902 | -0.155610 | 0.780057  |
| 1  | 3.967650  | -0.756020 | 0.086041  |
| 1  | 2.771432  | -2.045799 | 0.181919  |
| 1  | 2.901321  | -0.850193 | 1.501952  |
| 1  | 3.058624  | 2.070502  | -0.025030 |
| 1  | 2.109966  | 1.617014  | 1.403514  |
| 1  | 1.333571  | 2.416889  | 0.008043  |

18a

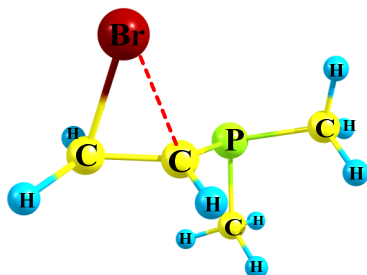

|    |   |           |           |           |
|----|---|-----------|-----------|-----------|
| 6  | 0 | -0.121444 | 0.466258  | 0.520453  |
| 6  | 0 | 0.793000  | 1.506861  | 0.061878  |
| 35 | 0 | 1.691874  | -0.260308 | -0.035710 |
| 15 | 0 | -1.491672 | -0.107905 | -0.586554 |
| 6  | 0 | -2.704848 | 1.073919  | 0.154848  |
| 6  | 0 | -1.918095 | -1.646818 | 0.320161  |
| 1  | 0 | -0.163528 | 0.312266  | 1.597663  |
| 1  | 0 | 1.314145  | 2.128513  | 0.779211  |
| 1  | 0 | 0.679572  | 1.880044  | -0.949360 |
| 1  | 0 | -3.682854 | 0.809156  | -0.249742 |
| 1  | 0 | -2.480281 | 2.092328  | -0.158753 |
| 1  | 0 | -2.747318 | 1.011938  | 1.242120  |
| 1  | 0 | -2.854649 | -2.023166 | -0.091822 |
| 1  | 0 | -2.043917 | -1.480083 | 1.389721  |
| 1  | 0 | -1.153380 | -2.402969 | 0.145092  |

18b

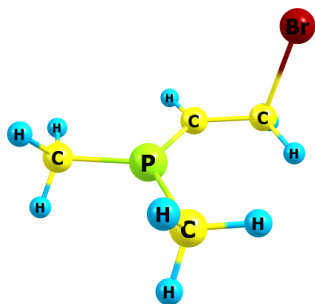

E(MP2) = -3070.8014342

|    |           |           |           |
|----|-----------|-----------|-----------|
| 6  | 0.438814  | -0.621709 | -0.703335 |
| 6  | -0.743762 | 0.184067  | -1.095067 |
| 35 | -2.076279 | -0.058621 | 0.283995  |
| 15 | 1.845542  | -0.025852 | -0.086810 |
| 6  | 3.159953  | -1.134525 | 0.420253  |
| 6  | 2.087932  | 1.725827  | 0.207761  |
| 1  | 0.379573  | -1.702681 | -0.793145 |
| 1  | -0.545693 | 1.247690  | -1.176775 |
| 1  | -1.172947 | -0.183711 | -2.022979 |
| 1  | 4.073388  | -0.878257 | -0.115112 |
| 1  | 2.862069  | -2.154428 | 0.184037  |
| 1  | 3.321850  | -1.030542 | 1.492858  |



|   |          |          |           |
|---|----------|----------|-----------|
| 1 | 2.949067 | 2.073803 | -0.361640 |
| 1 | 2.267160 | 1.877961 | 1.272256  |
| 1 | 1.194559 | 2.267734 | -0.094865 |

18c

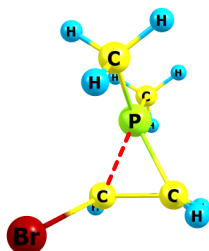

E(MP2) = -3070.8145787

|    |           |           |           |
|----|-----------|-----------|-----------|
| 6  | -0.140034 | -0.866804 | -0.128203 |
| 6  | 0.569794  | -1.031569 | 1.222797  |
| 15 | 1.390802  | 0.065242  | 0.062739  |
| 35 | -1.780683 | 0.063231  | -0.166505 |
| 6  | 1.255704  | 1.831579  | 0.327176  |
| 6  | 2.864903  | -0.522441 | -0.774932 |
| 1  | -0.109519 | -1.713972 | -0.802382 |
| 1  | 0.097779  | -0.557302 | 2.075100  |
| 1  | 1.034418  | -1.990262 | 1.420638  |
| 1  | 0.280224  | 2.032819  | 0.767009  |
| 1  | 1.340172  | 2.339875  | -0.632729 |
| 1  | 2.049187  | 2.158321  | 0.997656  |
| 1  | 3.739753  | -0.283389 | -0.171247 |
| 1  | 2.940540  | -0.041056 | -1.748929 |
| 1  | 2.787137  | -1.601340 | -0.899537 |

19a

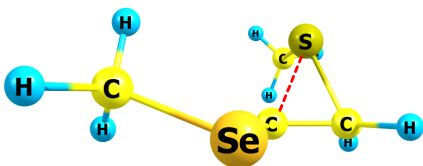

E(MP2) = -2955.0356387

|    |           |           |           |
|----|-----------|-----------|-----------|
| 6  | 0.288085  | 0.251569  | 0.607161  |
| 6  | 1.210102  | 1.359071  | 0.309308  |
| 16 | 1.665225  | -0.129886 | -0.660839 |
| 34 | -1.464073 | 0.336414  | -0.058446 |
| 6  | 3.009559  | -0.792947 | 0.355473  |
| 6  | -1.857837 | -1.550102 | 0.116545  |
| 1  | 0.478384  | -0.340247 | 1.496923  |
| 1  | 0.855162  | 2.156374  | -0.332610 |
| 1  | 1.968066  | 1.628361  | 1.034366  |
| 1  | 3.916204  | -0.245887 | 0.108877  |

|   |           |           |           |
|---|-----------|-----------|-----------|
| 1 | 3.111952  | -1.843885 | 0.097305  |
| 1 | 2.760703  | -0.679502 | 1.408157  |
| 1 | -2.895322 | -1.665343 | -0.186737 |
| 1 | -1.743835 | -1.855235 | 1.152298  |
| 1 | -1.215888 | -2.120085 | -0.548907 |

19b

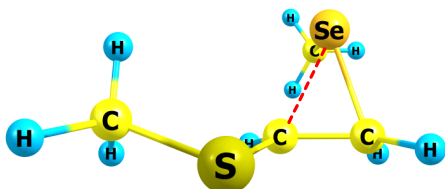

E(MP2) = -2955.0439313

|    |           |           |           |
|----|-----------|-----------|-----------|
| 6  | -0.569696 | 0.408235  | 0.668654  |
| 6  | 0.405797  | 1.471678  | 0.423730  |
| 34 | 1.084230  | -0.121406 | -0.509100 |
| 16 | -2.104841 | 0.480134  | -0.111741 |
| 6  | 2.308014  | -0.710128 | 0.870408  |
| 6  | -2.662036 | -1.220225 | 0.151481  |
| 1  | -0.469743 | -0.180831 | 1.575679  |
| 1  | 0.133816  | 2.249631  | -0.279837 |
| 1  | 1.067643  | 1.768368  | 1.227955  |
| 1  | 3.175031  | -0.056609 | 0.857164  |
| 1  | 2.584643  | -1.732266 | 0.627005  |
| 1  | 1.800364  | -0.673644 | 1.831206  |
| 1  | -3.674109 | -1.268852 | -0.242914 |
| 1  | -2.674670 | -1.450999 | 1.213454  |
| 1  | -2.021813 | -1.906509 | -0.398089 |

20a

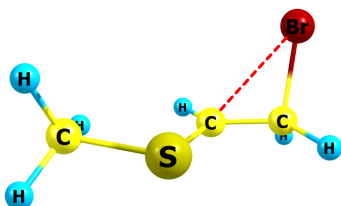

E(MP2) = -3087.7843773

|    |           |           |           |
|----|-----------|-----------|-----------|
| 6  | -0.707224 | 0.399521  | 0.577128  |
| 6  | 0.513417  | 1.164062  | 0.281693  |
| 35 | 1.735599  | -0.298005 | -0.070172 |
| 16 | -1.956722 | 0.352297  | -0.468020 |
| 6  | -3.130488 | -0.808768 | 0.263616  |
| 1  | -0.750162 | -0.169628 | 1.501704  |
| 1  | 0.451106  | 1.795226  | -0.598990 |
| 1  | 0.882389  | 1.702823  | 1.150087  |
| 1  | -4.113920 | -0.354223 | 0.169894  |

|   |           |           |           |
|---|-----------|-----------|-----------|
| 1 | -2.878776 | -0.983026 | 1.305276  |
| 1 | -3.083280 | -1.726644 | -0.318240 |

## 20b

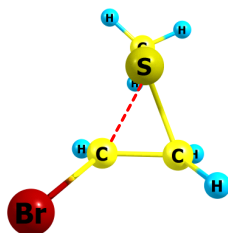

E(MP2) = -3087.7861051

|    |           |           |           |
|----|-----------|-----------|-----------|
| 6  | 0.094261  | 0.243551  | 0.570253  |
| 6  | 0.812618  | 1.387032  | -0.012488 |
| 16 | 1.451490  | -0.227226 | -0.621693 |
| 35 | -1.641648 | -0.149256 | 0.011398  |
| 6  | 2.866990  | -0.504474 | 0.472858  |
| 1  | 0.333824  | -0.074511 | 1.577249  |
| 1  | 0.321157  | 1.940245  | -0.803163 |
| 1  | 1.532972  | 1.924100  | 0.592059  |
| 1  | 2.995668  | -1.580899 | 0.554811  |
| 1  | 2.674944  | -0.058893 | 1.445487  |
| 1  | 3.732064  | -0.047127 | -0.002013 |

## 21a

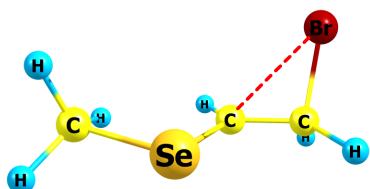

E(MP2) = -5090.1745917

|    |           |           |           |
|----|-----------|-----------|-----------|
| 6  | -0.258754 | 0.154401  | 0.753818  |
| 6  | 0.930153  | 1.004148  | 0.611320  |
| 35 | 2.180610  | -0.273181 | -0.141511 |
| 34 | -1.669345 | 0.326398  | -0.278195 |
| 6  | -2.767528 | -1.141763 | 0.326207  |
| 1  | -0.244208 | -0.629458 | 1.505813  |
| 1  | 0.820287  | 1.834274  | -0.079326 |
| 1  | 1.328125  | 1.322528  | 1.571282  |
| 1  | -3.781007 | -0.758528 | 0.407065  |
| 1  | -2.400904 | -1.485358 | 1.288198  |
| 1  | -2.709157 | -1.920384 | -0.429584 |

21b

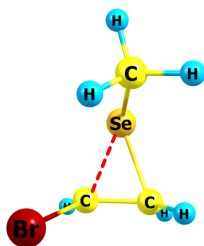

E(MP2) = -5090.1876915

|    |           |           |           |
|----|-----------|-----------|-----------|
| 6  | -0.325576 | 0.939795  | 0.187422  |
| 6  | 0.504076  | 1.235632  | -0.979029 |
| 34 | 1.518816  | 0.095597  | 0.277306  |
| 35 | -1.824901 | -0.150225 | 0.056545  |
| 6  | 1.161099  | -1.639283 | -0.481962 |
| 1  | -0.380098 | 1.673597  | 0.982373  |
| 1  | 0.288333  | 0.717696  | -1.905675 |
| 1  | 0.953394  | 2.218108  | -1.057835 |
| 1  | 1.756047  | -2.332055 | 0.108596  |
| 1  | 1.477696  | -1.637951 | -1.519924 |
| 1  | 0.098839  | -1.848696 | -0.373621 |
